# Supplementary material for: Anti-androgenic therapy with finasteride in patients with chronic heart failure - a retrospective propensity score based analysis
Source: PubMed Central journal article supplement (PMC6626053; doi:10.1038/s41598-019-46640-8), 2019-07-12
Supplement: 41598_2019_46640_MOESM1_ESM.pdf [file 41598_2019_46640_MOESM1_ESM.pdf]

# Supplementary information

## **Anti-androgenic therapy with finasteride in patients with chronic heart failure - a retrospective propensity score based analysis**

Badder Kattih<sup>a,b,§,#</sup>, Lukas Simon Elling<sup>a,#</sup>, Christel Weiss<sup>c</sup>, Marieke Bea<sup>a</sup>, Carolin Zwadlo<sup>a</sup>, Udo Bavendiek<sup>a</sup>, Johann Bauersachs<sup>a</sup> and Joerg Heineke<sup>a,b,\*</sup>

<sup>a</sup> Department of Cardiology and Angiology, Hannover Medical School, Carl-Neuberg-Straße 1, 30625 Hannover, Germany.

<sup>b</sup> Department of Cardiovascular Research, European Center for Angioscience (ECAS), Medical Faculty Mannheim of Heidelberg University, University Medical Centre Mannheim, Ludolf-Krehl Straße 7-11, 68167 Mannheim, Germany.

<sup>c</sup> Department for Medical Statistics and Biomathematics, Medical Faculty Mannheim of Heidelberg University, University Medical Centre Mannheim, Ludolf-Krehl Straße 9-13, 68167 Mannheim, Germany.

<sup>§</sup> Co-Correspondence: Department of Cardiovascular Research, European Center for Angioscience (ECAS), Medical Faculty Mannheim of Heidelberg University, University Medical Center Mannheim, Ludolf-Krehl Straße 7-11, phone no.: +49211-38371860, 68167 Mannheim, Germany. Electronic address: [Badder.Kattih@medma.uni-heidelberg.de](mailto:Badder.Kattih@medma.uni-heidelberg.de)

<sup>\*</sup> Correspondence: Department of Cardiovascular Research, European Center for Angioscience (ECAS), Medical Faculty Mannheim of Heidelberg University, University Medical Center Mannheim, Ludolf-Krehl Strasse 7-11, phone no.: +49211-38371850, 68167 Mannheim, Germany. Electronic address: [Joerg.Heineke@medma.uni-heidelberg.de](mailto:Joerg.Heineke@medma.uni-heidelberg.de)

<sup>#</sup> BK and LSE contributed equally to this work.

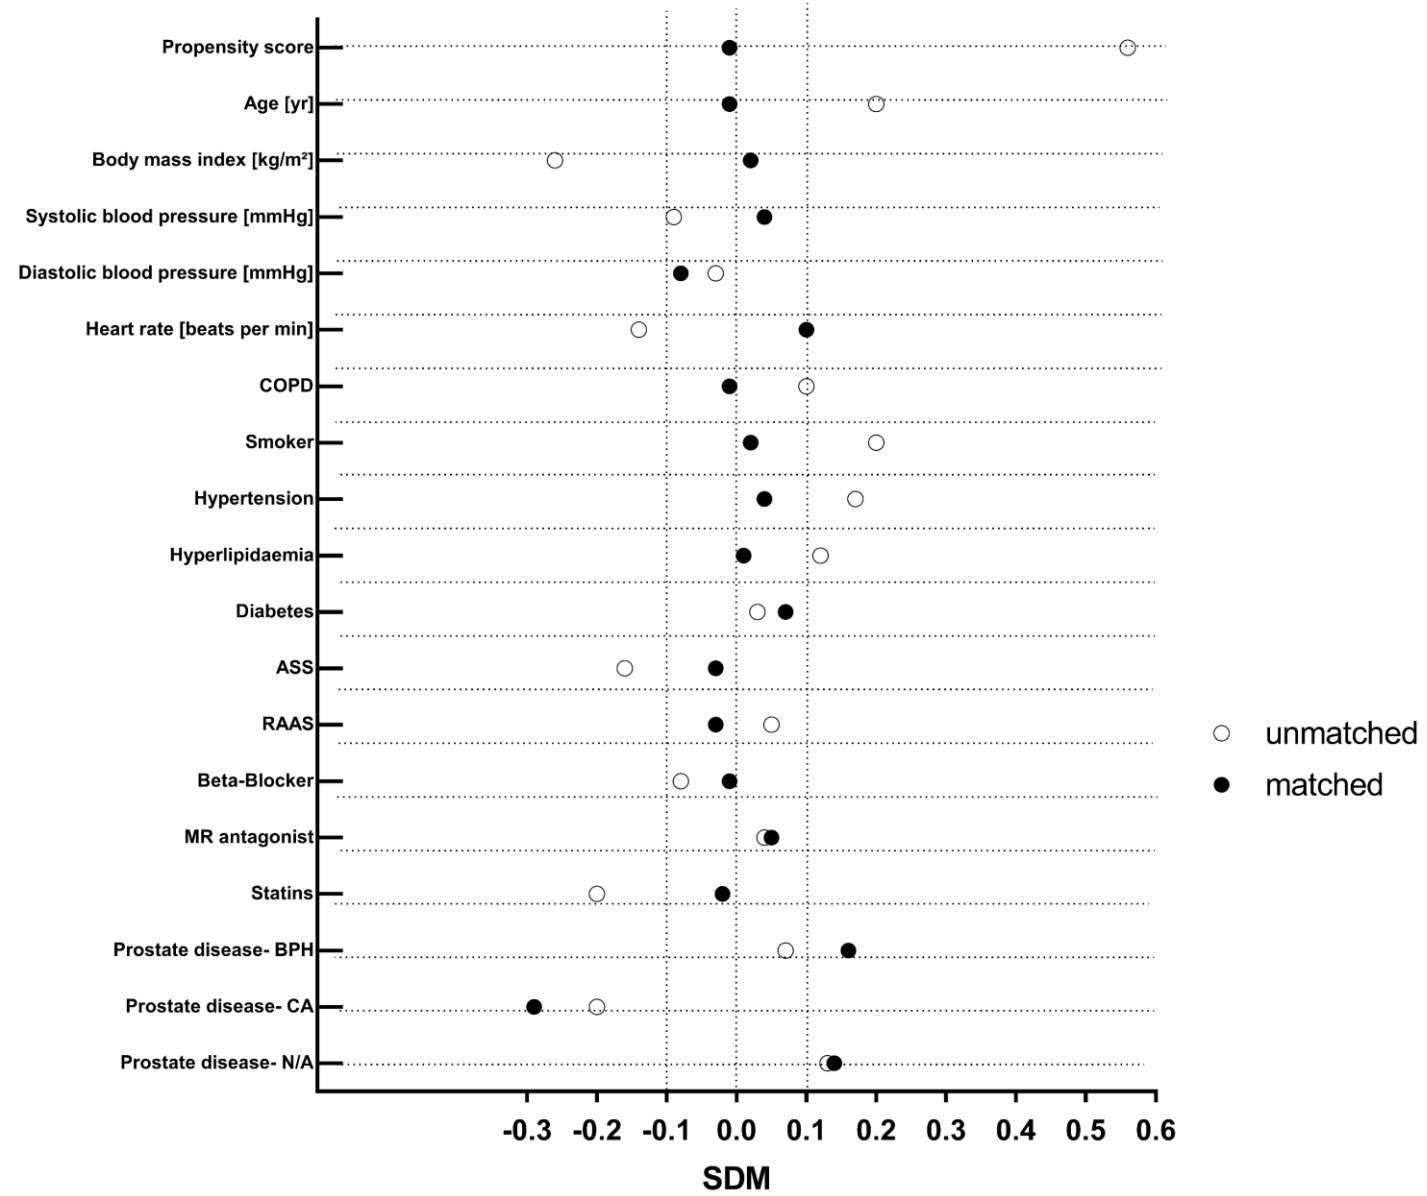

**Supplemental Figure S1.** Comparison of covariate balance by using absolute standardized differences between treated and control subjects in the unmatched (white circles) and the matched study sample (black circles). The standardized difference is the difference of the mean values or proportions (treatment - control group) divided by the pooled standard deviation. It measures the effect size between two groups and is independent from sample sizes. Matching on the logit of the propensity score has diminished many of systematic differences between treated and untreated subjects and resulted in balance in measured variables.

**Supplementary Table S1.** Baseline characteristics pre- and post-propensity score matching.

(detailed version of Table 1)

|                                           | unmatched cohort (total n = 1041) |                     |         | matched cohort (total n = 328) |                     |         |
|-------------------------------------------|-----------------------------------|---------------------|---------|--------------------------------|---------------------|---------|
|                                           | control group                     | treatment group     | p value | control group                  | treatment group     | p value |
|                                           | (total n = 868)                   | (total n = 173)     |         | (total n = 164)                | (total n = 164)     |         |
| <b>Propensity score</b>                   | 0.153924±0.0964985                | 0.227713±0.113189   | <0.001  | 0.227713±0.102900              | 0.217158±0.102488   | 0.996   |
| <b>Logit of propensity score</b>          | -1.911635±0.889430                | -1.338785±0.690426  | <0.001  | -1.393076±0.657590             | -1.393104±0.655751  | 0.996   |
| <b>Male sex</b>                           | 868/868 (100.0)                   | 173/173 (100.0)     |         | 164/164 (100.0)                | 164/164 (100.0)     |         |
| <b>Finasteride</b>                        | 0/868 (0.0)                       | 173/173 (100.0)     |         | 0/164 (0.0)                    | 164/164 (100.0)     |         |
| <b>Finasteride dose [mg/d]</b>            | 0.0±0.0 (0/868)                   | 5.1±0.7 (150/173)   |         | 0.0±0.0 (0/164)                | 5.1±0.6 (141/164)   |         |
| <b>Tamulosolin</b>                        | 868/868 (100.0)                   | 74/173 (42.8)       | <0.001  | 164/164 (100.0)                | 72/164 (43.9)       | <0.001  |
| <b>Age [yr]</b>                           | 74.1± 8.0 (n=868)                 | 75.9± 6.7 (n=173)   | 0.006   | 75.9± 7.7 (n=164)              | 75.8± 6.7 (n=164)   | 0.862   |
| <b>Body mass index [kg/m<sup>2</sup>]</b> | 27.1± 3.8 (n=868)                 | 25.8± 3.8 (n=173)   | <0.001  | 25.9± 3.6 (n=164)              | 25.9± 3.8 (n=164)   | 0.746   |
| <b>Body surface area [m<sup>2</sup>]</b>  | 1.99± 0.18 (868)                  | 1.96± 0.16 (173)    | 0.064   | 1.93± 0.16 (164)               | 1.96± 0.16 (164)    | 0.106   |
| <b>Systolic blood pressure [mmHg]</b>     | 132.4± 46.3 (n=868)               | 129.1± 19.6 (n=173) | 0.352   | 128.6± 21.6 (n=164)            | 129.5± 18.9 (n=164) | 0.607   |
| <b>Diastolic blood pressure [mmHg]</b>    | 74.5± 11.7 (n=868)                | 74.1± 12.3 (n=173)  | 0.576   | 75.0± 11.9 (n=164)             | 73.9± 11.6 (n=164)  | 0.346   |
| <b>Heart rate [beats per min]</b>         | 72.6± 17.1 (n=868)                | 70.2± 13.3 (n=173)  | 0.209   | 68.3± 15.7 (n=164)             | 70.1± 13.5 (n=164)  | 0.152   |
| <b>COPD</b>                               | 129/868 (14.9)                    | 34/173 (19.7)       | 0.113   | 33/164 (20.1)                  | 32/164 (19.5)       | 0.890   |
| <b>History of smoking</b>                 | 291/868 (33.5)                    | 79/173 (45.7)       | 0.002   | 72/164 (43.9)                  | 74/164 (45.1)       | 0.824   |
| <b>Hypertension</b>                       | 656/868 (75.6)                    | 145/173 (83.8)      | 0.019   | 134/164 (81.7)                 | 137/164 (83.5)      | 0.662   |
| <b>Hyperlipidemia</b>                     | 529/868 (60.9)                    | 117/173 (67.6)      | 0.098   | 108/164 (65.9)                 | 109/164 (66.5)      | 0.907   |
| <b>Diabetes mellitus</b>                  | 240/868 (27.6)                    | 51/173 (29.5)       | 0.624   | 42/164 (25.6)                  | 48/164 (29.3)       | 0.458   |
| <b>Aspirin</b>                            | 485/868 (55.9)                    | 80/173 (46.2)       | 0.020   | 80/164 (48.8)                  | 77/164 (46.9)       | 0.740   |
| <b>ACEI/ARBs</b>                          | 670/868 (77.2)                    | 138/173 (79.8)      | 0.457   | 134/164 (81.7)                 | 132/164 (80.5)      | 0.778   |
| <b>Beta-blockers</b>                      | 661/868 (76.2)                    | 124/173 (71.7)      | 0.212   | 120/164 (73.2)                 | 119/164 (72.6)      | 0.901   |
| <b>MR-antagonists</b>                     | 159/868 (18.3)                    | 35/173 (20.2)       | 0.555   | 29/164 (17.7)                  | 33/164 (20.1)       | 0.573   |
| <b>Statins</b>                            | 611/868 (70.4)                    | 101/173 (58.4)      | 0.002   | 101/164 (61.6)                 | 99/164 (60.4)       | 0.821   |
| <b>Diuretics</b>                          | 571/868 (65.8)                    | 108/173 (62.4)      | 0.397   | 115/164 (70.1)                 | 103/164 (62.8)      | 0.160   |
| <b>Prostate disease</b>                   |                                   |                     |         |                                |                     |         |
| <b>Benign prostatic hyperplasia</b>       | 836/868 (96.3)                    | 169/173 (97.7)      | <0.001  | 154/164 (93.9)                 | 160/164 (97.6)      | 0.005   |
| <b>Prostate cancer</b>                    | 32/868 (3.7)                      | 1/173 (0.6)         |         | 10/164 (6.1)                   | 1/164 (0.6)         |         |
| <b>N/A</b>                                | 0/868 (0.0)                       | 3/173 (1.7)         |         | 0/164 (0.0)                    | 3/164 (1.8)         |         |
| <b>NYHA status</b>                        |                                   |                     |         |                                |                     |         |
| <b>NYHA I</b>                             | 293/868 (33.8)                    | 37/173 (21.4)       | <0.001  | 50/164 (30.5)                  | 32/164 (19.5)       | 0.045   |
| <b>NYHA II</b>                            | 269/868 (31.0)                    | 43/173 (24.9)       |         | 51/164 (31.1)                  | 43/164 (26.2)       |         |
| <b>NYHA III</b>                           | 235/868 (27.1)                    | 73/173 (42.2)       |         | 50/164 (30.5)                  | 71/164 (43.3)       |         |
| <b>NYHA IV</b>                            | 36/868 (4.1)                      | 8/173 (4.6)         |         | 7/164 (4.3)                    | 7/164 (4.3)         |         |
| <b>N/A</b>                                | 35/868 (4.0)                      | 12/173 (6.9)        |         | 6/164 (3.7)                    | 11/164 (6.7)        |         |
| <b>Acute decompensation</b>               | 88/868 (10.1)                     | 28/173 (16.2)       | 0.021   | 16/164 (9.8)                   | 26/164 (15.9)       | 0.098   |
| <b>Valvular disease</b>                   | 137/868 (15.8)                    | 28/173 (16.2)       | 0.895   | 30/164 (18.3)                  | 27/164 (16.5)       | 0.662   |
| <b>Diastolic dysfunction</b>              | 228/868 (26.3)                    | 38/173 (21.9)       | 0.236   | 38/164 (23.2)                  | 37/164 (22.6)       | 0.895   |

Values are expressed as mean ± SD or n/ total n (%). Abbreviation: ACEi= angiotensin converting enzyme inhibitor, ARB= angiotensin receptor blocker, COPD= Chronic obstructive pulmonary disease, N/A = not available, NYHA= New York heart association.

**Supplementary Table S2.** Outcome parameters pre- and post- propensity score matching normalized to BSA.

|                          | unmatched cohort (total n=1041) |                                   |         |                                | matched cohort (total n=328)    |                                   |         |                                |
|--------------------------|---------------------------------|-----------------------------------|---------|--------------------------------|---------------------------------|-----------------------------------|---------|--------------------------------|
|                          | control group<br>(total n= 868) | treatment group<br>(total n= 173) | p value | ATT (95% confidence intervall) | control group<br>(total n= 164) | treatment group<br>(total n= 164) | p value | ATT (95% confidence intervall) |
| <b>normalized to BSA</b> |                                 |                                   |         |                                |                                 |                                   |         |                                |
| <b>IVS [mm]</b>          | 6.5± 1.3 (n=464)                | 6.6±1.3 (n=122)                   | 0.451   | 0.1 (-0.2 to 0.3)              | 6.9±1.4 (n=93)                  | 6.5±1.3 (n=114)                   | 0.029   | -0.4 (-0.8 to -0.04)           |
| <b>LVEDD [mm]</b>        | 27.0± 4.6 (n=540)               | 28.0±4.5 (n=141)                  | 0.007   | 0.9 (0.2 to 1.8)               | 27.3±4.8 (n=109)                | 28.1±4.5 (132)                    | 0.171   | 0.8 (-0.4 to 2.0)              |
| <b>LA-PLAX [mm]</b>      | 22.8± 4.1 (n=487)               | 23.2±4.5 (n=140)                  | 0.346   | 0.4 (-0.4 to 1.2)              | 23.3±4.2 (n=96)                 | 23.1±4.4 (n=131)                  | 0.670   | -0.2 (-1.4 to 0.9)             |

Abbreviation: ATT= average treatment effect on the treated, BSA= body surface area, IVS= Interventricular septum, LA-PLAX= Left atrium in parasternal long axis, LVEDD= Left ventricular enddiastolic diameter.

**Supplementary Table S3.** Distribution of patients per severity level of interventricular septal thickness.<sup>17</sup>

| matched cohort                        |               |                 |
|---------------------------------------|---------------|-----------------|
|                                       | control group | treatment group |
| <b>Normal range [6-10 mm]</b>         | 7/23 (30.4)   | 16/23 (69.6)    |
| <b>Mildly abnormal [11-13 mm]</b>     | 46/107 (43.0) | 61/107 (57.0)   |
| <b>Moderately abnormal [14-16 mm]</b> | 31/64 (48.4)  | 33/64 (51.6)    |
| <b>Severe abnormal [&gt;16 mm]</b>    | 9/13 (69.2)   | 4/13 (30.8)     |

Values are expressed as n/ total n (%). Raw values of Figure 2B.

**Supplementary Table S4.** Left ventricular cardiac function in the unmatched and matched study cohort.

|                                  | unmatched cohort (total n=1041) | matched cohort (total n=328) |
|----------------------------------|---------------------------------|------------------------------|
| <b>Left ventricular function</b> |                                 |                              |
| normal [>55%]                    | 397/1041 (38.1)                 | 118/328 (36.0)               |
| mildly reduced [45-55%]          | 282/1041 (27.1)                 | 79/328 (24.1)                |
| moderately reduced [35-44%]      | 238/1041 (22.9)                 | 81/328 (24.7)                |
| severely reduced [<35%]          | 124/1041 (11.9)                 | 50/328 (15.2)                |

Values are expressed as n/ total n (%). Raw values of Figure 1.

**Supplementary Table S5.** Distribution and level of NT-proBNP stratified by decompensation status.

|                                  | unmatched cohort (total n=1041) |                                   |         |                                   | matched cohort (total n=328)    |                                   |         |                                |
|----------------------------------|---------------------------------|-----------------------------------|---------|-----------------------------------|---------------------------------|-----------------------------------|---------|--------------------------------|
|                                  | control group<br>(total n= 868) | treatment group<br>(total n= 173) | p value | ATT (95% confidence<br>intervall) | control group<br>(total n= 164) | treatment group<br>(total n= 164) | p value | ATT (95% confidence intervall) |
| <b>(Ln)NT-proBNP</b>             |                                 |                                   |         |                                   |                                 |                                   |         |                                |
| <b>(no acute decompensation)</b> | 6.6±1.6 (127/780)               | 6.4±1.7 (28/145)                  | 0.757   | -0.2 (-0.9 to 0.4)                | 7.1±1.7 (28/148)                | 6.3±1.7 (27/138)                  | 0.079   | - 0.8 (-1.7 to 0.1)            |
| <b>(Ln)NT-proBNP</b>             |                                 |                                   |         |                                   |                                 |                                   |         |                                |
| <b>(acute decompensation)</b>    | 8.7±1.1 (36/88)                 | 8.1±0.7 (13/28)                   | 0.103   | -0.7 (-1.2 to -0.1)               | 9.5±1.1 (6/16)                  | 8.0±0.7 (12/26)                   | 0.003   | -1.5 (-2.4 to -0.6)            |
